# Supplementary material for: Rational design of nonlinear hybridization immunosensor chain reactions for simultaneous ultrasensitive detection of two tumor marker proteins
Source: Royal Society of Chemistry journal article supplement (doi:10.1039/d2ay01941h), 2023-01-01
Supplement: d2ay01941h1.pdf [file d2ay01941h1.pdf]

# Supplementary Materials for Rational design of nonlinear hybridization immunosensor chain reactions for simultaneous ultrasensitive detection of two tumor marker proteins

Zhaokui Zeng<sup>a,†</sup>, Xingchen Zhou<sup>b,†</sup>, Rong Zhou<sup>a</sup>, Zhuoer Zeng<sup>a</sup>, Ruwei Sun<sup>c</sup>, Xun Zhang<sup>c</sup>,  
Huimin Li<sup>d</sup>, Di Zhang<sup>e</sup>, Qubo Zhu<sup>a,\*</sup>, Chuanpin Chen<sup>a,\*</sup>

- a. Xiangya School of Pharmaceutical Sciences, Central South University, Changsha, Hunan 410013, China.
  - b. Department of Pharmacy, Xiangya Hospital, Central South University, Changsha 410013, China
  - c. Hunan Zaochen Nanorobot Co., Ltd, Liuyang 410300, Hunan, China.
  - d. Yueyang Inspection and Testing Center, Yueyang 414000, Hunan, China.
  - e. Department of Laboratory, The Third Xiangya Hospital, Central South University, Changsha 410013, Hunan, China.
- \* Correspondence: qubozhu@csu.edu.cn (Q.Z); ccpin2000@hotmail.com (C.C.)

## Table of Contents

### 1. Oligonucleotides used in the experiment

| Name        | Sequence (5'-3')                                                                |
|-------------|---------------------------------------------------------------------------------|
| Trigger     | Biotin-AAAAATGACGAACTAGTTGATGAAGCTG                                             |
| F-A         | 6-FAM-GTGTGCCTATTATGTCTCCTCCTGTGTGCCTATTATGTCTCCT<br>CCTCAGCTTCATCAACTAGTTCGTCA |
| Q-A         | AACTAGTTGATGAAGCTGGACATAATAGGCACACGACATAATAGGCACAC-<br>BHQ1                     |
| F-B         | AGGAGGAGACATAATAGGCACACTGACGAACTAGTTGATGAAGCTG-6-<br>FAM                        |
| Q-B         | BHQ1-CAGCTTCATCAACTAGGTGTGCCTATTATGTCTC                                         |
| Assistant A | GTGCCTATTATGTCTGTGCCTATTATGTCCAGCTT                                             |
| Assistant B | ACACCTAGTTGATGAAGC                                                              |

**Table S1. Composition and volume of different NHCR mixtures**

| NHCR mixture | Composition and volume                                                                        |
|--------------|-----------------------------------------------------------------------------------------------|
| (1)          | 27 $\mu$ L NHCR buffer + 10 $\mu$ L 0.1 $\mu$ M DNA + 10 $\mu$ L NHCR A + 20 $\mu$ L NHCR B   |
| (2)          | 27 $\mu$ L NHCR buffer + 10 $\mu$ L 0.01 $\mu$ M DNA + 10 $\mu$ L NHCR A + 20 $\mu$ L NHCR B  |
| (3)          | 27 $\mu$ L NHCR buffer + 10 $\mu$ L 0.001 $\mu$ M DNA + 10 $\mu$ L NHCR A + 20 $\mu$ L NHCR B |
| (4)          | 37 $\mu$ L NHCR buffer + 10 $\mu$ L NHCR A + 20 $\mu$ L NHCR B                                |
| (5)          | 47 $\mu$ L NHCR buffer + 10 $\mu$ L 0.001 $\mu$ M DNA + 10 $\mu$ L NHCR A                     |
| (6)          | 37 $\mu$ L NHCR buffer + 10 $\mu$ L 0.001 $\mu$ M DNA + 20 $\mu$ L NHCR B                     |

**Table S2. Comparison of the proposed method with other analytical methods for AFP detection**

| Detection method                                                                   | Signal output        | LOD               | Reference          |
|------------------------------------------------------------------------------------|----------------------|-------------------|--------------------|
| Aptamer nanoprobe based FRET                                                       | Fluorescence         | 1.38 ng/mL        | [1]                |
| Phage-mediated sandwich immunoassay of double nanoantibody                         | Chemiluminescence    | 0.24 ng/mL        | [2]                |
| Photoelectrochemical electrode based on reduced graphene oxide honeycomb structure | Photoelectrochemical | 0.05 ng/mL        | [3]                |
| Fluorescence immunoassay based on polymer device                                   | Fluorescence         | 13.00 pg/mL       | [4]                |
| Sandwich temperature-responsive polymicrogel based on ELISA                        | Colorimetric         | 8.40 pg/mL        | [5]                |
| <b>NHCR based immunoassay</b>                                                      | <b>Fluorescence</b>  | <b>1.74 pg/mL</b> | <b>This method</b> |

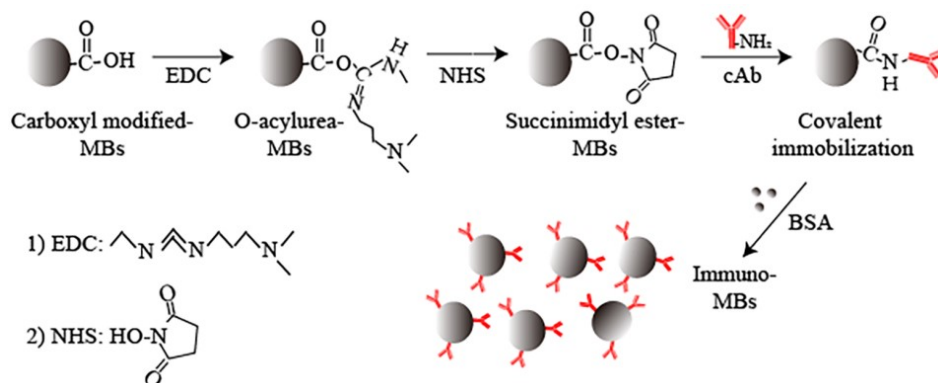

**Fig. S1** Schematic diagram of preparation process of immunomagnetic beads. Carboxyl groups on MBs react with EDC to form unstable O-acylurea on MBs. NHS replaces EDC to form stable succinyl ester on MBs. The -NH<sub>2</sub> group on the capture antibody replaces NHS and forms a stable amide bond on the MBs. BSA is added to block the redundant binding sites on the MBs.

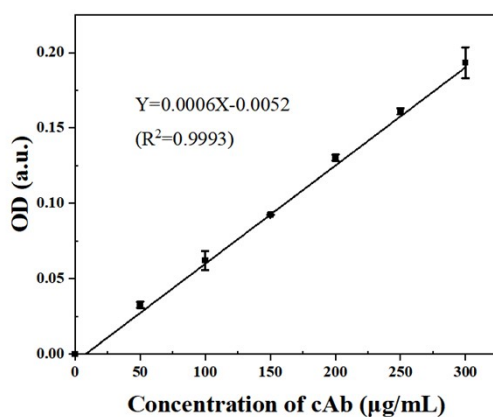

**Fig. S2** The relationship between MBs conjugated cAbAFP concentration and OD.

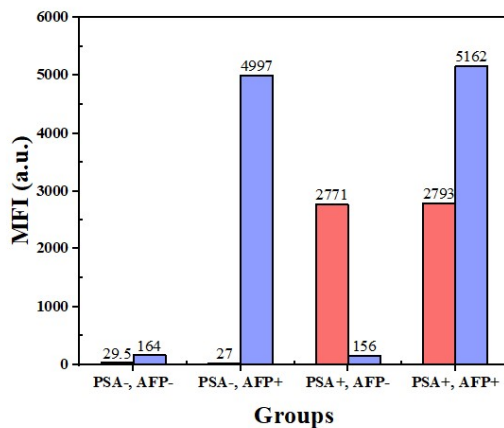

**Fig. S3** Fluorescence signal diagram of simultaneous detection of AFP and PSA by

immunoassay based on NHCR. The concentrations of PSA and AFP are 4 ng/mL and 10 ng/mL respectively.

## Reference

- [1] Li G, J Zeng, H Liu, et al. A fluorometric aptamer nanoprobe for alpha-fetoprotein by exploiting the FRET between 5-carboxyfluorescein and palladium nanoparticles[J]. *Mikrochimica Acta*, 2019, 186(5): 314.
- [2] Su B, Y Wang, H Pei, et al. Phage-mediated double-nanobody sandwich immunoassay for detecting alpha fetal protein in human serum[J]. *Analytical Methods*, 2020, 12(39): 4742-4748.
- [3] Wu Y, H Su, J Yang, et al. Photoelectrochemical immunosensor for sensitive detection of alpha-fetoprotein based on a graphene honeycomb film[J]. *Journal of Colloid and Interface Science*, 2020, 580: 583-591.
- [4] Chang J, N Gao, P Dai, et al. Facile engineered polymeric microdevice via co-coupling of phenylboronic acid and Protein A for oriented antibody immobilization enables substantial signal enhancement for an enhanced fluorescence immunoassay[J]. *Sensors and Actuators B: Chemical*, 2021, 346: 130444.
- [5] Su R, L Xia, G Li, et al. A controlled recognizing and releasing glycoprotein based on temperature-responsive phenylboronic microgels for colorimetric analysis of complex samples[J]. *Talanta*, 2022, 241: 123260.
